# Supplementary material for: Graft patency at 3 months after off- and on-pump coronary bypass surgery: a randomized trial
Source: Springer Nature journal article supplement (doi:10.1007/s12055-019-00869-0), 2019-10-28
Supplement: MOESM1 [file 17319310]

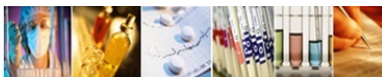

Clinical Trial Details (PDF Generation Date :- Sun, 30 Sep 2018 08:47:10 GMT)

|                                                                                            |                                                                                                                                              |                                                                                                   |
|--------------------------------------------------------------------------------------------|----------------------------------------------------------------------------------------------------------------------------------------------|---------------------------------------------------------------------------------------------------|
| <b>CTRI Number</b>                                                                         | CTRI/2017/10/010030 [Registered on: 06/10/2017] - <b>Trial Registered Retrospectively</b>                                                    |                                                                                                   |
| <b>Last Modified On</b>                                                                    | 10/10/2017                                                                                                                                   |                                                                                                   |
| <b>Post Graduate Thesis</b>                                                                | No                                                                                                                                           |                                                                                                   |
| <b>Type of Trial</b>                                                                       | Interventional                                                                                                                               |                                                                                                   |
| <b>Type of Study</b>                                                                       | Surgical/Anesthesia                                                                                                                          |                                                                                                   |
| <b>Study Design</b>                                                                        | Randomized, Crossover Trial                                                                                                                  |                                                                                                   |
| <b>Public Title of Study</b>                                                               | Comparison of graft patency in on-pump heart surgery versus off-pump heart Surgery                                                           |                                                                                                   |
| <b>Scientific Title of Study</b>                                                           | Prospective Randomized comparison of Off-pump and On-pump Multi-vessel Coronary artery bypass surgery To Evaluate outcomes and graft patency |                                                                                                   |
| <b>Secondary IDs if Any</b>                                                                | <b>Secondary ID</b>                                                                                                                          | <b>Identifier</b>                                                                                 |
|                                                                                            | NIL                                                                                                                                          | NIL                                                                                               |
| <b>Details of Principal Investigator or overall Trial Coordinator (multi-center study)</b> | <b>Details of Principal Investigator</b>                                                                                                     |                                                                                                   |
|                                                                                            | <b>Name</b>                                                                                                                                  | Dr Lokeswara Rao Sajja                                                                            |
|                                                                                            | <b>Designation</b>                                                                                                                           | Sr. Consultant Cardiothoracic Surgeon                                                             |
|                                                                                            | <b>Affiliation</b>                                                                                                                           | STAR Hospitals                                                                                    |
|                                                                                            | <b>Address</b>                                                                                                                               | 8-2-596/5, Road No.10, Banjara Hills, Hyderabad<br>Hyderabad<br>ANDHRA PRADESH<br>500034<br>India |
|                                                                                            | <b>Phone</b>                                                                                                                                 | 91-9849028317                                                                                     |
|                                                                                            | <b>Fax</b>                                                                                                                                   |                                                                                                   |
|                                                                                            | <b>Email</b>                                                                                                                                 | sajjalr@yahoo.com                                                                                 |
| <b>Details Contact Person (Scientific Query)</b>                                           | <b>Details Contact Person (Scientific Query)</b>                                                                                             |                                                                                                   |
|                                                                                            | <b>Name</b>                                                                                                                                  | Dr Lokeswara Rao Sajja                                                                            |
|                                                                                            | <b>Designation</b>                                                                                                                           | Sr. Consultant Cardiothoracic Surgeon                                                             |
|                                                                                            | <b>Affiliation</b>                                                                                                                           | STAR Hospitals                                                                                    |
|                                                                                            | <b>Address</b>                                                                                                                               | 8-2-596/5, Road No.10, Banjara Hills, Hyderabad<br><br>ANDHRA PRADESH<br>500034<br>India          |
|                                                                                            | <b>Phone</b>                                                                                                                                 | 91-9849028317                                                                                     |
|                                                                                            | <b>Fax</b>                                                                                                                                   |                                                                                                   |
|                                                                                            | <b>Email</b>                                                                                                                                 | sajjalr@yahoo.com                                                                                 |
| <b>Details Contact Person (Public Query)</b>                                               | <b>Details Contact Person (Public Query)</b>                                                                                                 |                                                                                                   |
|                                                                                            | <b>Name</b>                                                                                                                                  | Dr Lokeswara Rao Sajja                                                                            |
|                                                                                            | <b>Designation</b>                                                                                                                           | Sr. Consultant Cardiothoracic Surgeon                                                             |
|                                                                                            | <b>Affiliation</b>                                                                                                                           | STAR Hospitals                                                                                    |
|                                                                                            | <b>Address</b>                                                                                                                               | 8-2-596/5, Road No.10, Banjara Hills, Hyderabad<br><br>ANDHRA PRADESH<br>500034<br>India          |
|                                                                                            | <b>Phone</b>                                                                                                                                 | 91-9849028317                                                                                     |
|                                                                                            | <b>Fax</b>                                                                                                                                   |                                                                                                   |
|                                                                                            | <b>Email</b>                                                                                                                                 | sajjalr@yahoo.com                                                                                 |



|                                               |                                               |                                                                              |                                                                                                |                                                          |                                         |
|-----------------------------------------------|-----------------------------------------------|------------------------------------------------------------------------------|------------------------------------------------------------------------------------------------|----------------------------------------------------------|-----------------------------------------|
| <b>Source of Monetary or Material Support</b> | <b>Source of Monetary or Material Support</b> |                                                                              |                                                                                                |                                                          |                                         |
|                                               | > None                                        |                                                                              |                                                                                                |                                                          |                                         |
| <b>Primary Sponsor</b>                        | <b>Primary Sponsor Details</b>                |                                                                              |                                                                                                |                                                          |                                         |
|                                               | <b>Name</b>                                   | Dr Lokeswara Rao Sajja                                                       |                                                                                                |                                                          |                                         |
|                                               | <b>Address</b>                                | Star Hospitals, 8-2-596/5, Road No.10, Banjara Hills, Hyderabad - 500034     |                                                                                                |                                                          |                                         |
|                                               | <b>Type of Sponsor</b>                        | Other [Individual]                                                           |                                                                                                |                                                          |                                         |
| <b>Details of Secondary Sponsor</b>           | <b>Name</b>                                   | <b>Address</b>                                                               |                                                                                                |                                                          |                                         |
|                                               | Dr Gopichand Mannam                           | Star Hospitals, 8-2-596/5, Road No.10, Banjara Hills, Hyderabad - 500034     |                                                                                                |                                                          |                                         |
|                                               | Dr Kunal Sarkar                               | Medica Superspeciality Hospital, 127-Mukundapur, EM bypass, Kolkata - 700025 |                                                                                                |                                                          |                                         |
| <b>Countries of Recruitment</b>               | <b>List of Countries</b>                      |                                                                              |                                                                                                |                                                          |                                         |
|                                               | India                                         |                                                                              |                                                                                                |                                                          |                                         |
| <b>Sites of Study</b>                         | <b>Name of Principal Investigator</b>         | <b>Name of Site</b>                                                          | <b>Site Address</b>                                                                            | <b>Phone/Fax/Email</b>                                   |                                         |
|                                               | Dr Sanjeeth Peter                             | DDMM Heart Institute                                                         | Mission Road, Nadiad - 387002, Ahmadabad GUJARAT                                               | 91-9825929270<br>sanjeethpeter@gmail.com                 |                                         |
|                                               | Dr Anvay Mulay                                | Fortis Multispeciality Hospital                                              | Mulund West, Goregaon Link Road, Mumbai - 400078 Mumbai (Suburban) MAHARASHTRA                 | 91-9320174093<br>anvay03@gmail.com                       |                                         |
|                                               | Dr Chandra Sekhar Padmanabhan                 | GKNM Hospital                                                                | PB No:6327, Nethaji Road, Pappanaickenpalayam, Coimbatore - 641 037 Coimbatore TAMIL NADU      | 91-9443047152<br>chanpad@gmail.com                       |                                         |
|                                               | Dr KV Krishna Kumar                           | Krishna Intitute of Medical Sciences (KIMS)                                  | 1-8-31/1, Minister Road, Krishna Nagar Colony, Begumpet, Secunderabad Hyderabad ANDHRA PRADESH | 91-9849012912<br>vkkumark@hotmail.com                    |                                         |
|                                               | Dr Kunal Sarkar                               | Medica Super Speciality Hospital                                             | 127 Mukundapur, EM Bypass, Kolkata - 700025 Kolkata WEST BENGAL                                | 91-9830080006<br>kunal.cardiac@gmail.com                 |                                         |
|                                               | Dr Gopichand Mannam                           | STAR Hospitals                                                               | 8-2-596/5, Road No.10, Banjara Hills, Hyderabad - 500034 Hyderabad ANDHRA PRADESH              | 91-9849027027<br>91-40-23356788<br>gopi.mannam@gmail.com |                                         |
|                                               | Dr Lokeswara Rao Sajja                        | STAR Hospitals                                                               | 8-2-596/5, Road No.10, Banjara Hills, Hyderabad - 500034 Hyderabad ANDHRA PRADESH              | 91-9849028317<br>91-40-23356788<br>sajjalr@yahoo.com     |                                         |
|                                               | <b>Details of Ethics Committee</b>            | <b>Name of Committee</b>                                                     | <b>Approval Status</b>                                                                         | <b>Date of Approval</b>                                  | <b>Is Independent Ethics Committee?</b> |
|                                               |                                               |                                                                              |                                                                                                |                                                          |                                         |



|                                                |                        |                   |    |
|------------------------------------------------|------------------------|-------------------|----|
| Institutional Ethics Committee - DDMM          | Approved               | 05/01/2016        | No |
| Institutional Ethics Committee - Fortis Mumbai | Approved               | 31/03/2016        | No |
| Institutional Ethics Committee - GKNM          | Approved               | 18/12/2015        | No |
| Institutional Ethics Committee - Medica        | Submitted/Under Review | No Date Specified | No |
| Institutional Ethics Committee - STAR          | Approved               | 21/11/2015        | No |
| Institutional Ethics Committee - STAR          | Approved               | 21/11/2015        | No |
| KIMS Foundation & Research Center              | Approved               | 04/02/2016        | No |

**Regulatory Clearance Status from DCGI**

| Status         | Date              |
|----------------|-------------------|
| Not Applicable | No Date Specified |

**Health Condition / Problems Studied**

| Health Type | Condition                            |
|-------------|--------------------------------------|
| Patients    | Multi-vessel Coronary Artery Disease |

**Intervention / Comparator Agent**

| Type             | Name          | Details                                 |
|------------------|---------------|-----------------------------------------|
| Intervention     | Off-Pump CABG | Beating Heart Surgery                   |
| Comparator Agent | On-Pump CABG  | Heart Surgery on Cardiopulmonary Bypass |

**Inclusion Criteria**

| Inclusion Criteria |                                                                                                                                                                                                                                                                                                                                                                                                 |
|--------------------|-------------------------------------------------------------------------------------------------------------------------------------------------------------------------------------------------------------------------------------------------------------------------------------------------------------------------------------------------------------------------------------------------|
| Age From           | 21.00 Year(s)                                                                                                                                                                                                                                                                                                                                                                                   |
| Age To             | 70.00 Year(s)                                                                                                                                                                                                                                                                                                                                                                                   |
| Gender             | Both                                                                                                                                                                                                                                                                                                                                                                                            |
| Details            | <ol style="list-style-type: none"> <li>1. Male or female aged ?21years to ?70years</li> <li>2. Able to provide written informed consent</li> <li>3. Patients with significant CAD with significant triple vessel disease or LMCA stenosis angiographically documented ischemia due to multi vessel coronary artery disease</li> <li>4. Require isolated CABG</li> <li>5. LVEF ? 40 %</li> </ol> |

**Exclusion Criteria**

| Exclusion Criteria |                                                                                                                                                                                                                                                                                                                                                                                                                                                                                                                                                              |
|--------------------|--------------------------------------------------------------------------------------------------------------------------------------------------------------------------------------------------------------------------------------------------------------------------------------------------------------------------------------------------------------------------------------------------------------------------------------------------------------------------------------------------------------------------------------------------------------|
| Details            | <ol style="list-style-type: none"> <li>1. CABG with concomitant valvular procedures</li> <li>2. CABG with concomitant repair of congenital heart disease.</li> <li>3. Contra-indications to off-pump CABG or on-pump CABG (calcified aorta, intramuscular LAD, calcified coronaries, small target vessels, resection of ventricular aneurysm)</li> <li>4. Severe congestive heart failure, Ney York Heart Association (NYHA) Class III or IV or pulmonary edema.</li> <li>5. Chronic atrial fibrillation</li> <li>6. Allergy to contrast material</li> </ol> |



|                                                                                                                                                         | <p>7. Prior valve replacement or Redo CABG</p> <p>8. Prior percutaneous coronary intervention (PCI) with stent implantation within 3 months</p> <p>9. Concomitant medical disorders making clinical follow-up at least 3 months unlikely or impossible e.g. neoplastic, hepatic, or other severe disease</p> <p>10. Emergency CABG</p> <p>11. LVEF <math>\geq</math> 39 %</p> <p>12. Unable to give consent</p>                                                                                                                                                  |         |            |                                                                                                                                                         |                                                                                                                |
|---------------------------------------------------------------------------------------------------------------------------------------------------------|------------------------------------------------------------------------------------------------------------------------------------------------------------------------------------------------------------------------------------------------------------------------------------------------------------------------------------------------------------------------------------------------------------------------------------------------------------------------------------------------------------------------------------------------------------------|---------|------------|---------------------------------------------------------------------------------------------------------------------------------------------------------|----------------------------------------------------------------------------------------------------------------|
| <b>Method of Generating Random Sequence</b>                                                                                                             | Stratified block randomization                                                                                                                                                                                                                                                                                                                                                                                                                                                                                                                                   |         |            |                                                                                                                                                         |                                                                                                                |
| <b>Method of Concealment</b>                                                                                                                            | Sequentially numbered, sealed, opaque envelopes                                                                                                                                                                                                                                                                                                                                                                                                                                                                                                                  |         |            |                                                                                                                                                         |                                                                                                                |
| <b>Blinding/Masking</b>                                                                                                                                 | Open Label                                                                                                                                                                                                                                                                                                                                                                                                                                                                                                                                                       |         |            |                                                                                                                                                         |                                                                                                                |
| <b>Primary Outcome</b>                                                                                                                                  | <table border="1"> <thead> <tr> <th>Outcome</th> <th>Timepoints</th> </tr> </thead> <tbody> <tr> <td>The primary outcome is the assessment of Conventional coronary angiographic patency of the grafts at 3 months.</td> <td>The primary outcome is the assessment of Conventional coronary angiographic patency of the grafts at 3 months.</td> </tr> </tbody> </table>                                                                                                                                                                                         | Outcome | Timepoints | The primary outcome is the assessment of Conventional coronary angiographic patency of the grafts at 3 months.                                          | The primary outcome is the assessment of Conventional coronary angiographic patency of the grafts at 3 months. |
| Outcome                                                                                                                                                 | Timepoints                                                                                                                                                                                                                                                                                                                                                                                                                                                                                                                                                       |         |            |                                                                                                                                                         |                                                                                                                |
| The primary outcome is the assessment of Conventional coronary angiographic patency of the grafts at 3 months.                                          | The primary outcome is the assessment of Conventional coronary angiographic patency of the grafts at 3 months.                                                                                                                                                                                                                                                                                                                                                                                                                                                   |         |            |                                                                                                                                                         |                                                                                                                |
| <b>Secondary Outcome</b>                                                                                                                                | <table border="1"> <thead> <tr> <th>Outcome</th> <th>Timepoints</th> </tr> </thead> <tbody> <tr> <td>The secondary outcome is the occurrence of the composite of cardiovascular death, stroke, nonfatal MI, or new onset renal failure (AKI) requiring CRRT.</td> <td>At 3 months</td> </tr> </tbody> </table>                                                                                                                                                                                                                                                   | Outcome | Timepoints | The secondary outcome is the occurrence of the composite of cardiovascular death, stroke, nonfatal MI, or new onset renal failure (AKI) requiring CRRT. | At 3 months                                                                                                    |
| Outcome                                                                                                                                                 | Timepoints                                                                                                                                                                                                                                                                                                                                                                                                                                                                                                                                                       |         |            |                                                                                                                                                         |                                                                                                                |
| The secondary outcome is the occurrence of the composite of cardiovascular death, stroke, nonfatal MI, or new onset renal failure (AKI) requiring CRRT. | At 3 months                                                                                                                                                                                                                                                                                                                                                                                                                                                                                                                                                      |         |            |                                                                                                                                                         |                                                                                                                |
| <b>Target Sample Size</b>                                                                                                                               | <p><b>Total Sample Size=400</b></p> <p><b>Sample Size from India=400</b></p>                                                                                                                                                                                                                                                                                                                                                                                                                                                                                     |         |            |                                                                                                                                                         |                                                                                                                |
| <b>Phase of Trial</b>                                                                                                                                   | N/A                                                                                                                                                                                                                                                                                                                                                                                                                                                                                                                                                              |         |            |                                                                                                                                                         |                                                                                                                |
| <b>Date of First Enrollment (India)</b>                                                                                                                 | 23/03/2016                                                                                                                                                                                                                                                                                                                                                                                                                                                                                                                                                       |         |            |                                                                                                                                                         |                                                                                                                |
| <b>Date of First Enrollment (Global)</b>                                                                                                                | No Date Specified                                                                                                                                                                                                                                                                                                                                                                                                                                                                                                                                                |         |            |                                                                                                                                                         |                                                                                                                |
| <b>Estimated Duration of Trial</b>                                                                                                                      | <p><b>Years=1</b></p> <p><b>Months=0</b></p> <p><b>Days=0</b></p>                                                                                                                                                                                                                                                                                                                                                                                                                                                                                                |         |            |                                                                                                                                                         |                                                                                                                |
| <b>Recruitment Status of Trial (Global)</b>                                                                                                             | Not Applicable                                                                                                                                                                                                                                                                                                                                                                                                                                                                                                                                                   |         |            |                                                                                                                                                         |                                                                                                                |
| <b>Recruitment Status of Trial (India)</b>                                                                                                              | Completed                                                                                                                                                                                                                                                                                                                                                                                                                                                                                                                                                        |         |            |                                                                                                                                                         |                                                                                                                |
| <b>Publication Details</b>                                                                                                                              | none yet                                                                                                                                                                                                                                                                                                                                                                                                                                                                                                                                                         |         |            |                                                                                                                                                         |                                                                                                                |
| <b>Brief Summary</b>                                                                                                                                    | <p>This is a prospective randomized multicenter trial comparing off-pump CABG and on-pump CABG in 400 indian patients (200 patients in each group) undergoing isolated primary CABG surgery will be enrolled in the study from 6 centers in India.</p> <p>The study will compare graft patency of off-pump and on-pump coronary artery bypass surgery procedures in patients with multi-vessel coronary artery disease who referred for isolated CABG in Indian population due to inconsistency in the literature as to the relative benefits of on-pump and</p> |         |            |                                                                                                                                                         |                                                                                                                |

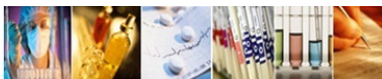

off-pump CABG. The purpose is to provide efficacy and graft patency data in Indian population. The primary objective of this study is to assess coronary artery bypass graft patency evaluation at 3 months by Conventional coronary angiographic patency in patients randomized to off-pump and on-pump multi vessel coronary artery bypass grafting (CABG). The secondary objective is to evaluate outcomes of CABG at 30 days, MACCE up to 3 months, to assess functional status and Quality of life at 3 months.
